# Supplementary material for: Pre-Meal Effect of Whey Proteins on Metabolic Parameters in Subjects with and without Type 2 Diabetes: A Randomized, Crossover Trial
Source: PubMed Central journal article supplement (PMC5852698; doi:10.3390/nu10020122), 2018-01-25
Supplement: nutrients-10-00122-s001.pdf [file nutrients-10-00122-s001.pdf]

**Supplementary Table S1.** Means (95%-CI) of appetite parameters. Subjects with ( $n = 12$ ) and without type 2 diabetes (T2D) ( $n = 12$ )<sup>1</sup> were observed after consumption of a pre-meal of whey proteins (WP) or water followed by a fat-rich main meal.

| Parameter                     | Type 2 diabetes          |                           | Non-diabetes              |                          | ANOVA, <i>P</i> -Value <sup>3</sup> |                 |                     |
|-------------------------------|--------------------------|---------------------------|---------------------------|--------------------------|-------------------------------------|-----------------|---------------------|
|                               | Whey protein             | Water                     | Whey protein              | Water                    | Diabetes × intervention             | Diabetes × time | Intervention × time |
| Fullness, mm                  | 9 457<br>(5 829–13 085)  | 14 169<br>(10 540–17 797) | 14 052<br>(10 424–17 681) | 11 448<br>(7 820–15 076) | 0.7553                              | 0.7859          | 0.6666              |
| Satiety, mm                   | 11 384<br>(8 307–14 462) | 10 363<br>(7 286–13 441)  | 10 912<br>(7 835–13 989)  | 10 876<br>(7 798–13 953) | 0.6124                              | 0.8530          | 0.8836              |
| Hunger <sup>2</sup> , mm      | 12 070<br>(8 677–15 463) | 9 978<br>(6 585–13 371)   | 9 245<br>(5 852–12 639)   | 7 501<br>(4 108–10 894)  | 0.4170                              | 0.9778          | 0.1897              |
| Prospective <sup>2</sup> , mm | 7 930<br>(5 022–10 837)  | 8 388<br>(5 481–11 295)   | 8 899<br>(5 992–11 806)   | 9 243<br>(6 336–12 150)  | 0.2542                              | 0.8482          | 0.7501              |

<sup>1</sup> Values are means (95% confidence interval) unless otherwise stated. <sup>2</sup> Medians (95% confidence interval). <sup>3</sup> The hypothesis was to test if the response curves for the two interventions during the postprandial period were parallel. No third-order interactions were found for the measured parameters except for glucagon ( $P = 0.0352$ ). Significant main effects were found for diabetes on perspective consumption ( $P = 0.0216$ ) and of intervention on fullness ( $P = 0.0135$ ). No significant main effects of diabetes on fullness ( $P = 0.2765$ ), satiety ( $P = 0.1803$ ) and hunger ( $P = 0.1526$ ). No significant main interaction of intervention satiety ( $P = 0.1506$ ), hunger ( $P = 0.436$ ) and prospective consumption ( $P = 0.463$ ).
