# Supplementary material for: Pre-Meal Effect of Whey Proteins on Metabolic Parameters in Subjects with and without Type 2 Diabetes: A Randomized, Crossover Trial
Source: MDPI journal article supplement (doi:10.3390/nu10020122), 2018-01-25
Supplement: s1 [file s1]

**Supplementary Table S1.** Means (95%-CI) of appetite parameters. Subjects with (n=12) and without type 2 diabetes (T2D) (n=12)<sup>1</sup> were observed after consumption of a pre-meal of whey proteins or water followed by a fat-rich main meal.

| Parameter, unit | Time, min | Type 2 diabetes  |                  | Non-diabetes     |                  | P-value <sup>3</sup>    |                 |                     |
|-----------------|-----------|------------------|------------------|------------------|------------------|-------------------------|-----------------|---------------------|
|                 |           | Whey protein     | Water            | Whey protein     | Water            | Diabetes X intervention | Diabetes X time | Intervention X time |
| Fullness, mm    | -15       | 23.9 (16.1-31.7) | 29.4 (21.5-37.0) | 21.6 (14.0-29.3) | 29.4 (21.4-36.7) | 0.7553                  | 0.7859          | 0.6666              |
|                 | 0         | 25.8 (18.1-33.6) | 31.2 (23.4-39.0) | 23.6 (15.9-31.2) | 31.0 (23.3-38.6) |                         |                 |                     |
|                 | 30        | 76.0 (68.2-83.7) | 81.1 (73.5-88.7) | 73.7 (66.0-81.3) | 81.3 (73.5-89.1) |                         |                 |                     |
|                 | 180       | 55.0 (47.2-62.8) | 60.1 (52.5-67.8) | 52.7 (45.1-60.3) | 60.3 (52.6-68.1) |                         |                 |                     |
|                 | 360       | 37.5 (29.7-45.3) | 42.7 (35.0-50.3) | 35.2 (27.6-42.9) | 42.5 (34.7-50.3) |                         |                 |                     |
| Satiety, mm     | -15       | 32.4 (25.7-39.1) | 41.7 (35.0-48.3) | 33.7 (29.1-40.3) | 37.2 (30.5-43.9) | 0.6124                  | 0.8530          | 0.8836              |
|                 | 0         | 32.0 (25.3-38.7) | 40.7 (34.2-47.3) | 33.3 (26.7-39.8) | 36.8 (30.1-43.5) |                         |                 |                     |
|                 | 30        | 79.9 (73.2-86.6) | 88.6 (82.1-95.2) | 81.2 (74.6-87.8) | 84.7 (78.0-91.4) |                         |                 |                     |
|                 | 180       | 59.1 (52.4-65.8) | 67.9 (61.3-74.5) | 60.4 (53.9-67.0) | 63.9 (57.2-70.6) |                         |                 |                     |
|                 | 360       | 38.2 (31.4-44.9) | 47.2 (40.6-53.8) | 39.8 (33.2-46.3) | 43.2 (36.5-50.0) |                         |                 |                     |
| Hunger, mm      | -15       | 59.1 (51.3-66.8) | 41.6 (33.7-49.4) | 51.4 (43.6-59.2) | 49.3 (41.5-57.0) | 0.4170                  | 0.9778          | 0.1897              |
|                 | 0         | 59.9 (52.1-67.6) | 42.4 (34.6-50.2) | 52.2 (44.4-60.0) | 50.1 (42.3-57.8) |                         |                 |                     |
|                 | 30        | 19.1 (11.4-26.9) | 1.6 (0-9.4)      | 11.4 (3.6-19.2)  | 9.3 (1.6-17.1)   |                         |                 |                     |
|                 | 180       | 39.7 (31.9-47.4) | 22.2 (14.4-30.0) | 32.0 (24.2-39.8) | 29.9 (22.1-37.6) |                         |                 |                     |
|                 | 360       | 65.1 (57.3-72.9) | 47.3 (39.5-55.1) | 57.1 (49.3-64.9) | 55.0 (47.2-68.8) |                         |                 |                     |
| Prospective, mm | -15       | 69.6 (52.7-75.6) | 52.0 (45.0-59.0) | 59.3 (52.3-66.2) | 61.6 (54.5-68.6) | 0.2542                  | 0.8482          | 0.7501              |
|                 | 0         | 69.4 (62.5-76.3) | 51.7 (44.8-58.7) | 59.0 (52.1-65.9) | 62.1 (55.2-69.0) |                         |                 |                     |
|                 | 30        | 32.1 (25.2-39.0) | 14.5 (7.5-21.4)  | 21.7 (14.8-28.7) | 24.8 (17.9-31.7) |                         |                 |                     |
|                 | 180       | 46.3 (39.4-53.2) | 28.7 (21.8-35.6) | 35.9 (29.0-42.9) | 39.0 (32.1-45.9) |                         |                 |                     |
|                 | 360       | 64.6 (57.7-71.4) | 46.9 (40.0-53.8) | 54.2 (47.3-61.1) | 57.3 (50.4-64.2) |                         |                 |                     |

<sup>1</sup> Values are means (95% confidence interval) unless otherwise stated. <sup>2</sup> Medians (95% confidence interval). <sup>3</sup> The hypothesis was to test if the response curves for the two interventions during the postprandial period were parallel. No third-order interactions were found for the measured parameters except for glucagon (P=0.0352). Significant main effects were found for diabetes on perspective consumption (P=0.0216) and of intervention on fullness (P=0.0135). No significant main effects of diabetes on fullness (P=0.2765), satiety (P=0.1803) and hunger (P=0.1526). No significant main interaction of intervention satiety (P=0.1506), hunger (P=0.436) and prospective consumption (P=0.463).
